# Supplementary material for: Single-step chemical vapour deposition of anti-pyramid MoS2/WS2 vertical heterostructures
Source: Royal Society of Chemistry journal article supplement (doi:10.1039/d0nr08281c), 2021-01-01
Supplement: d0nr08281c1.pdf [file d0nr08281c1.pdf]

## Supplementary Information

### Single-step Chemical Vapour Deposition of Anti-pyramid MoS<sub>2</sub>/WS<sub>2</sub> Vertical Heterostructures

Xueyin Bai,<sup>1,\*</sup> Shisheng Li,<sup>2</sup> Susobhan Das,<sup>1</sup> LuoJun Du,<sup>1</sup> Yunyun Dai,<sup>1</sup> Lide Yao,<sup>3</sup> Ramesh Raju,<sup>1</sup> Mingde Du,<sup>1</sup> Harri Lipsanen,<sup>1</sup> and Zhipei Sun<sup>1,4</sup>

1. Department of Electronics and Nanoengineering, Aalto University, Finland
2. International Center for Young Scientists (ICYS), National Institute for Materials Science (NIMS), Japan
3. Department of Applied Physics, Aalto University, Finland
4. QTF Centre of Excellence, Department of Applied Physics, Aalto University, Finland

E-mail: [xueyin.bai@aalto.fi](mailto:xueyin.bai@aalto.fi)

#### Calculation of SHG intensity from second-order susceptibility

The total SHG intensity in the heterostructure with an angle between two layers,  $I_h(\theta)$ , is expressed as<sup>1</sup>

$$I_h(\theta) = I_1 + I_2 + 2\sqrt{I_1 I_2} \cos \theta \quad (1)$$

where  $I_h(\theta)$  stands for the SHG intensity in the stacking heterostructure;  $\theta$  is the stacking angle, which is defined as the different angle between two stacking layers and is 60° in AA' stacking. Meanwhile, the SH intensity  $I$  is proportional to the square of polarization  $P$  as  $I \propto P^2$ . The relationship between polarization and susceptibility is<sup>2</sup>

$$P = \chi^{(1)}E + \chi^{(2)}E^2 + \chi^{(3)}E^3 + \dots \quad (2)$$

where  $(\chi^{(1)})$ ,  $(\chi^{(2)})$  and  $(\chi^{(3)})$  stand for linear, second-order and third-order susceptibilities, respectively; and  $E$  is the electrical field of the incident light. Hence, it can be deduced that  $I \propto (\chi^{(2)})^2$  and the equation (1) can be written as

$$I_h(\theta) \propto (\chi_1^{(2)})^2 + (\chi_2^{(2)})^2 + 2|\chi_1^{(2)}||\chi_2^{(2)}|\cos \theta \quad (3)$$

## Optical micrograph over a wide area and a histogram of grain sizes

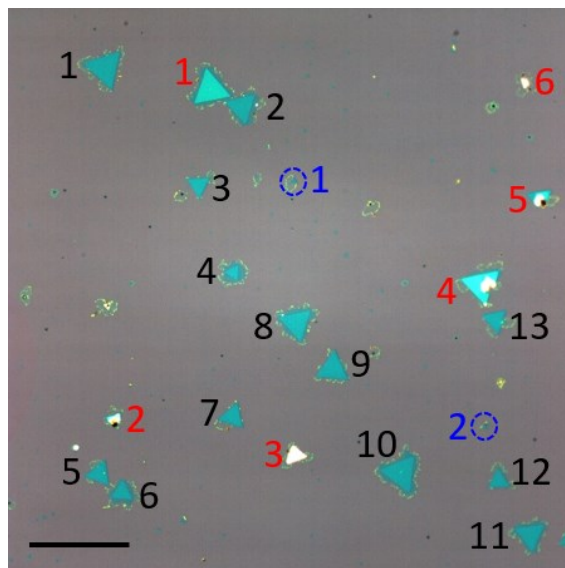

Figure S1. Optical micrograph over a wide area of MoS<sub>2</sub>/WS<sub>2</sub> heterostructures (black numbers), bulk flakes (red numbers) and small monolayer WS<sub>2</sub> (blue numbers). Scale Bar, 100  $\mu\text{m}$ .

## Optical characterization of MoS<sub>2</sub> flakes on the substrate with Na<sub>2</sub>MoO<sub>4</sub>

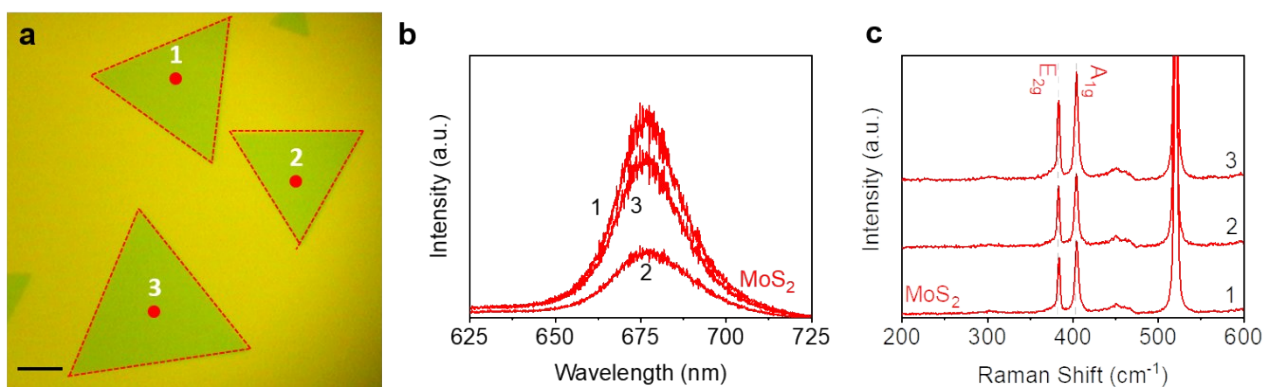

Figure S2. Optical characterization of MoS<sub>2</sub> flakes on the substrate with Na<sub>2</sub>MoO<sub>4</sub>. (a) Optical microscopy images of MoS<sub>2</sub> flakes (Scale Bar, 25  $\mu\text{m}$ ). (b) PL and (c) Raman spectra of the marked positions in (a), respectively.

## AFM characterization of a typical MoS<sub>2</sub>/WS<sub>2</sub> heterostructure

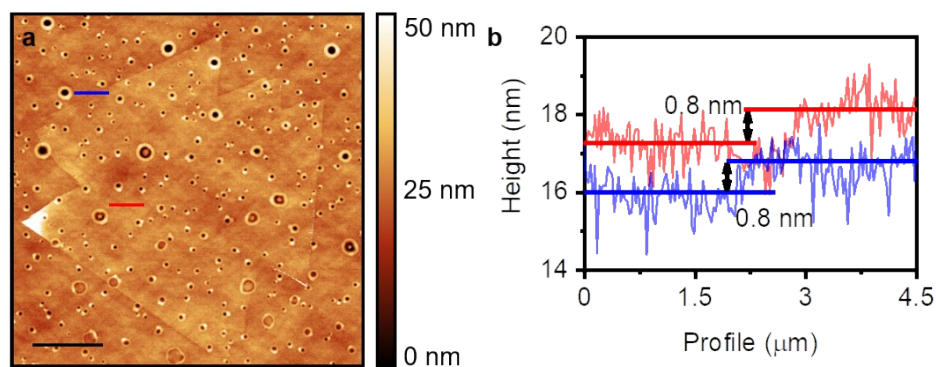

Figure S3. AFM image. (a) AFM image of MoS<sub>2</sub>/WS<sub>2</sub> heterostructure (The holes are created by the etchant of sodium.<sup>3</sup> (Scale Bar: 10 μm). (b) the height profiles of marked lines in (a).

## Statistical data of anti-pyramid heterostructures

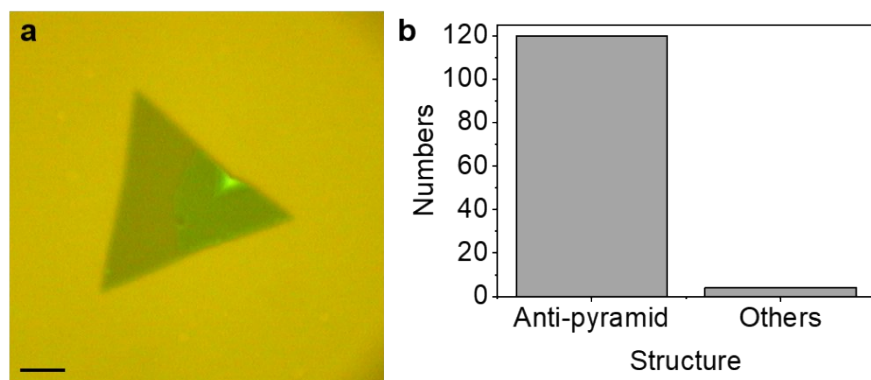

Figure S4. Statistical data of anti-pyramid heterostructures. (a) An example of a non-anti-pyramid heterostructure (Scale Bar, 10 μm). (b) Statistics of anti-pyramid heterostructures and others.

## Artificial anti-pyramid MoS<sub>2</sub>/WS<sub>2</sub> heterostructure

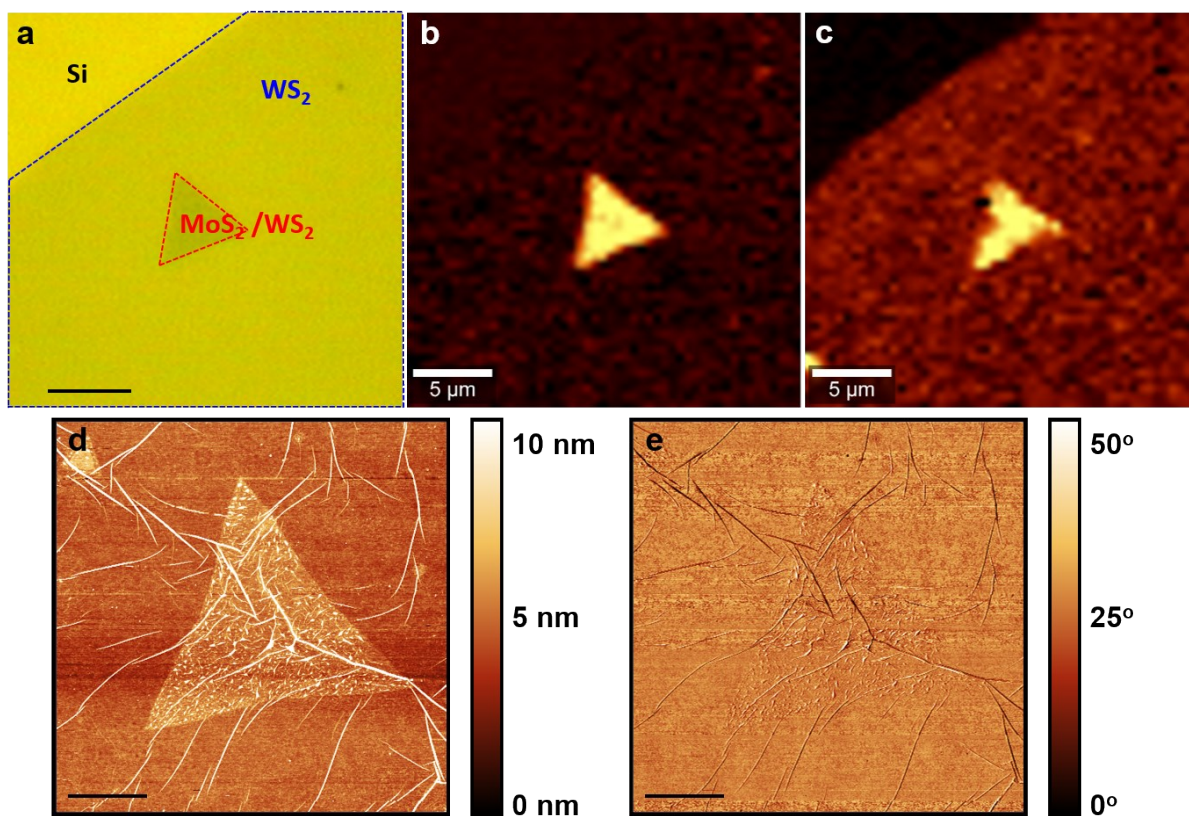

Figure S5. Artificial anti-pyramid MoS<sub>2</sub>/WS<sub>2</sub> heterostructures by transferring a thin film of monolayer WS<sub>2</sub> on triangular flakes of monolayer MoS<sub>2</sub>. (a) Optical image of an artificial heterostructure (Scale Bar, 5 μm). (b-c) Raman mapping at (b) 385 cm<sup>-1</sup> (MoS<sub>2</sub>) and (c) 351 cm<sup>-1</sup> (WS<sub>2</sub>) with a 532 nm laser, respectively. (d-e) AFM (d) topographic and (e) phase images.

## Diffusion of precursors

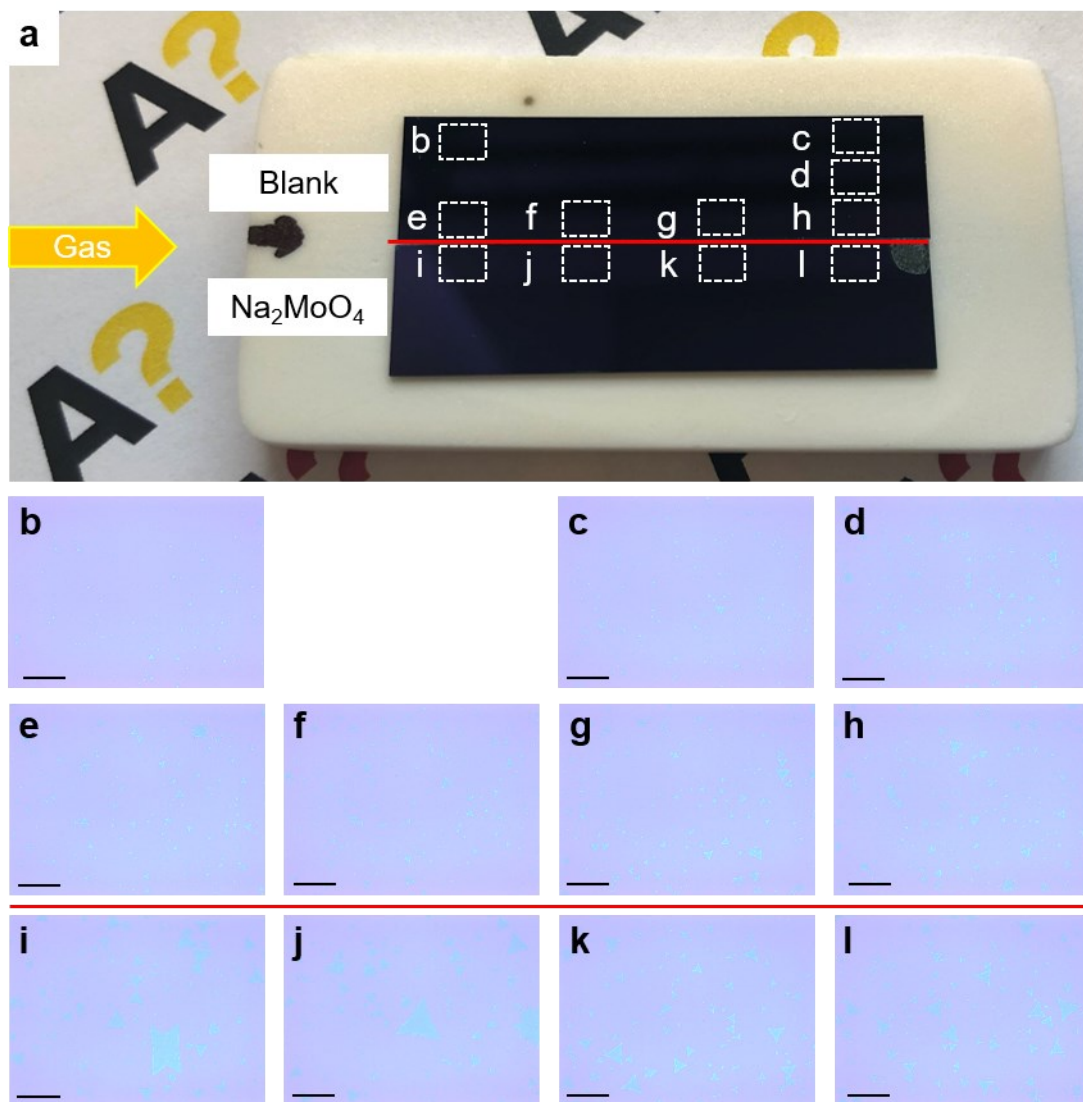

Figure S6. Control experiment of Na<sub>2</sub>MoO<sub>4</sub> diffusion. (a) Photograph of a blank substrate and substrate coated with Na<sub>2</sub>MoO<sub>4</sub>. (b-i) Optical microscopy images of the marked position in (a) (Scale Bar: 100  $\mu$ m). The MoS<sub>2</sub> flakes on the blank substrate indicate the diffusion of Na<sub>2</sub>MoO<sub>4</sub>.



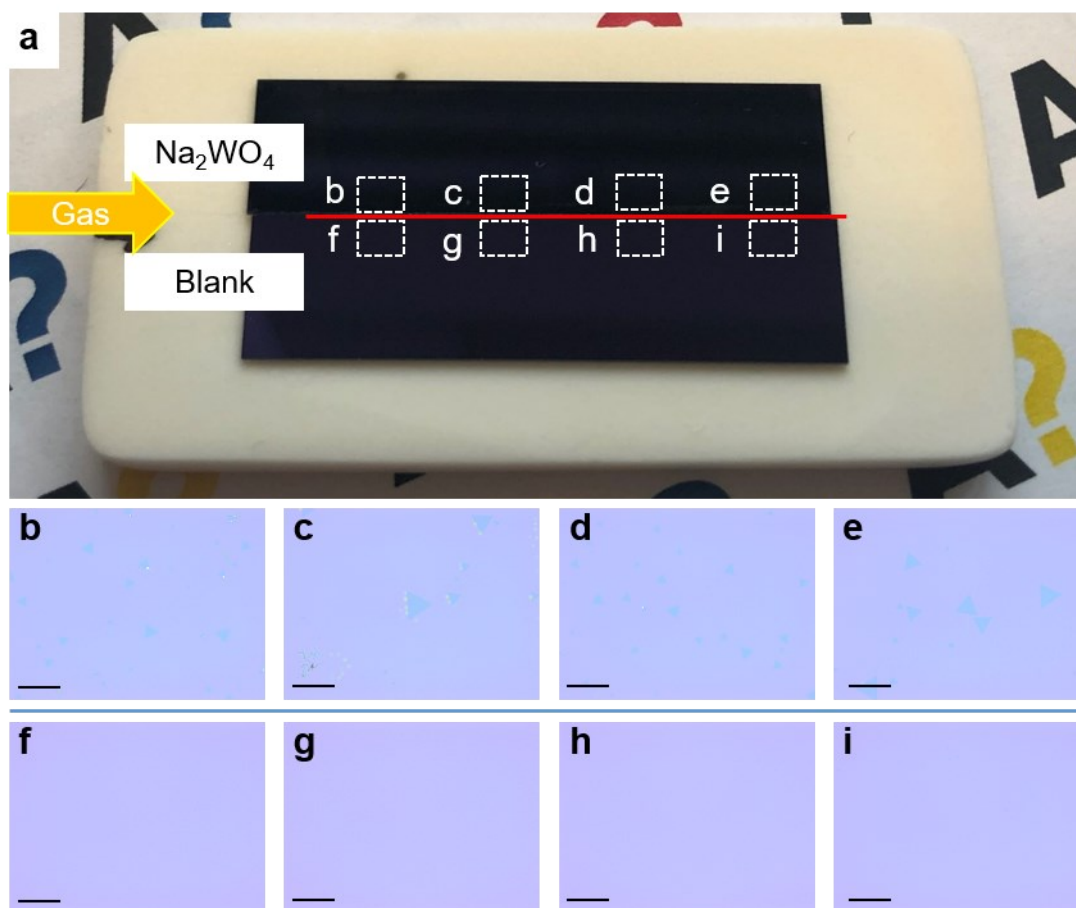

Figure S7. Control experiment of  $\text{Na}_2\text{WO}_4$  diffusion. (a) Photography of a blank substrate and substrate coated with  $\text{Na}_2\text{WO}_4$ . (b-i) Optical microscopy images of the marked position in (a) (Scale Bar: 100  $\mu\text{m}$ ). No  $\text{WS}_2$  flakes on the blank substrate indicate no diffusion of  $\text{Na}_2\text{WO}_4$ .

## Growth result of the mixture $\text{Na}_2\text{MoO}_4$ and $\text{Na}_2\text{WO}_4$

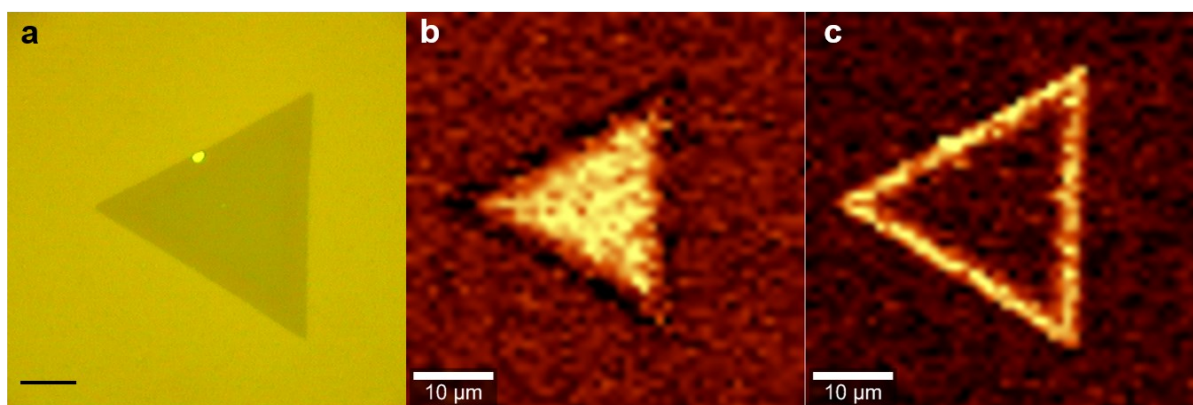

Figure S8. Growth result of the mixture of  $\text{Na}_2\text{MoO}_4$  and  $\text{Na}_2\text{WO}_4$  as precursors. (a) Optical image of a flake (Scale Bar, 10  $\mu\text{m}$ ). (b-c) Raman mapping at (b) 385  $\text{cm}^{-1}$  ( $\text{MoS}_2$ ) and (c) 351  $\text{cm}^{-1}$  ( $\text{WS}_2$ ), respectively. Clearly, the mixture of  $\text{Na}_2\text{MoO}_4$  and  $\text{Na}_2\text{WO}_4$  as precursors forms a lateral heterostructure instead of the anti-pyramid vertical heterostructure.

## References

- (1) Hsu, W.-T.; Zhao, Z.-A.; Li, L.-J.; Chen, C.-H.; Chiu, M.-H.; Chang, P.-S.; Chou, Y.-C.; Chang, W.-H. Second harmonic generation from artificially stacked transition metal dichalcogenide twisted bilayers. *ACS Nano* 2014, **8**, 2951-2958.
- (2) Autere, A.; Jussila, H.; Dai, Y.; Wang, Y.; Lipsanen, H.; Sun, Z. Nonlinear optics with 2D layered materials. *Adv. Mater.* 2018, **30**, 1705963.
- (3) Choi, S.H.; Kim, Y.J.; Yang, W.; Kim, K.K. Alkali Metal-Assisted Growth of Single-Layer Molybdenum Disulfide. *J Korean Phys. Soc.* 2019, **74**, 1032-1038
